# Supplementary material for: Parasitoid Wasps Can Manipulate Host Trehalase to the Benefit of Their Offspring
Source: MDPI journal article supplement (doi:10.3390/insects13090833), 2022-09-13
Supplement: s1 [file s1]

**Table S1.** Species names and GenBank accessions of proteins from insect species used for multiple alignment and phylogenetic tree analysis.

| Gene name     | GenBank accessions |
|---------------|--------------------|
| <i>TcTre1</i> | XP_015838405.1     |
| <i>TcTre2</i> | XP_008200736.1     |
| <i>TcTre3</i> | XP_015838404.1     |
| <i>TcTre4</i> | XP_008197280.2     |
| <i>TcTre5</i> | XP_973891.1        |
| <i>TcTre6</i> | XP_008191350.2     |
| <i>BmTre</i>  | NP_001037458.1     |
| <i>AglTre</i> | JQ246351           |
| <i>SeTre</i>  | EU427311           |
| <i>HaTre1</i> | XP_021195450.1     |
| <i>HaTre2</i> | XP_021194411.1     |
| <i>AaTre</i>  | XP_021705796.1     |
| <i>AmTre1</i> | NP_001106141.1     |
| <i>AmTre2</i> | XP_006560260.1     |
| <i>DmTre</i>  | NP_726024.1        |
| <i>LmTre</i>  | FJ795020.1         |
| <i>NlTre1</i> | XP_022193105.2     |
| <i>NlTre2</i> | XP_039290147.1     |
| <i>NlTre3</i> | XP_039297459.1     |
| <i>OfTre1</i> | EF426724.1         |
| <i>OfTre2</i> | EF426723.1         |
| <i>CmTre1</i> | KR149447.1         |
| <i>CmTre2</i> | KR149447.1         |
| <i>GpTre1</i> | MN915102.1         |
| <i>GpTre2</i> | MN915101.1         |
| <i>SfTre1</i> | XP_035432686.1     |
| <i>SfTre2</i> | XP_035456757.1     |
| <i>SfTre3</i> | XP_035432458.1     |
| <i>SfTre4</i> | XP_035432458.1     |
| <i>SfTre5</i> | XP_035433375.1     |
| <i>SfTre6</i> | XP_035433201.1     |
| <i>AgTre</i>  | XP_320471.4        |

**Table S2.** Primers used for qRT-PCR of *Trehalase* genes in *Spodoptera litura*.

| Gene name            | Primer sequence (5'-3') | Product size(bp) |
|----------------------|-------------------------|------------------|
| <i>Trehalase 1 F</i> | ATCGTTATAGTTTGGTCCCT    | 135              |
| <i>Trehalase 1 R</i> | TTCTTTTAGCGGTTTCTT      |                  |
| <i>Trehalase 2 F</i> | CCAATCACAAGGACCCAG      | 113              |
| <i>Trehalase 2 R</i> | CAGCCGCAGCTTTCAACT      |                  |
| <i>EF1 F</i>         | GAAACCGCTAAATACTATGTCA  | 161              |
| <i>EF1 R</i>         | CGGGTCTGTCCGTTCTTC      |                  |
| <i>GAPDH F</i>       | CTGCTAAAGCCGTAGGAAA     | 113              |
| <i>GAPDH R</i>       | CTGCTAAAGCCGTAGGAAA     |                  |

**Table S3.** Oligonucleotide templates used to synthesize siRNA.

| Gene Name                   | Primer sequence (5'-3')                         |
|-----------------------------|-------------------------------------------------|
| <i>Oligo- 1 Trehalase 1</i> | GATCACTAATACGACTCACTATAGGGGGACACCACCGATTTC AATT |
| <i>Oligo-2 Trehalase 1</i>  | AATTGAAATCGGGTGGTGTCCCCCTATAGTGAGTCGTATTAGTGATC |
| <i>Oligo-3 Trehalase 1</i>  | AAGGACACCACCGATTTC AACCCTATAGTGAGTCGTATTAGTGATC |
| <i>Oligo-4 Trehalase 1</i>  | GATCACTAATACGACTCACTATAGGGTTGAAATCGGGTGGTGTCTT  |
| <i>Oligo- 1 Trehalase 2</i> | GATCACTAATACGACTCACTATAGGGCCAGCGAGATCGCTACTAATT |
| <i>Oligo- 2 Trehalase 2</i> | AATTAGTAGCGATCTCGCTGGCCCTATAGTGAGTCGTATTAGTGATC |
| <i>Oligo- 3 Trehalase 2</i> | AACCAGCGAGATCGCTACTAACCCTATAGTGAGTCGTATTAGTGATC |
| <i>Oligo- 4 Trehalase 2</i> | GATCACTAATACGACTCACTATAGGGTTAGTAGCGATCTCGCTGGTT |
| <i>Oligo-1GFP</i>           | GATCACTAATACGACTCACTATAGGGGGGATGTCTCACATCTTGTTT |
| <i>Oligo-2GFP</i>           | AAACAAGATGTGAGACATCCCCCTATAGTGAGTCGTATTAGTGATC  |
| <i>Oligo-3GFP</i>           | AAGGGATGTCTCACATCTTGTCCTATAGTGAGTCGTATTAGTGATC  |
| <i>Oligo-4GFP</i>           | GATCACTAATACGACTCACTATAGGGACAAGATGTGAGACATCCCTT |

**Table S4.** Statistical values of ANOVA in the present study.

|                               |                 | Treatment | F-value | df       | p-value    | 95% C.I.   |            |            |
|-------------------------------|-----------------|-----------|---------|----------|------------|------------|------------|------------|
|                               |                 |           |         |          |            | lower      | upper      |            |
| Relative expression level     | SITre1          | 0d        | 2.04    | 7        | 0.11       | 0.0688138  | 0.2936235  |            |
|                               |                 | 1d        | 14.89   | 7        | 0.0182     | -0.2797636 | -0.0456531 |            |
|                               |                 | 3d        | 12.14   | 7        | 0.0119     | -0.3021293 | -0.0534075 |            |
|                               |                 | 5d        | 421.4   | 7        | 3.33E-05   | 1.021293   | 1.340746   |            |
|                               | SITre2          | 0d        | 0.16    | 7        | 0.21       | -0.5216307 | -0.4145546 |            |
|                               |                 | 1d        | 91.19   | 7        | 0.00672    | 0.1262028  | 0.2296699  |            |
|                               |                 | 3d        | 12.78   | 7        | 0.0233     | -0.4225094 | -0.0531486 |            |
|                               |                 | 5d        | 402.3   | 7        | 3.70E-07   | 3.829535   | 4.180167   |            |
|                               | SITre1          | 24h       | 760.1   | 7        | 1.03E-05   | -0.3590172 | -0.3228618 |            |
|                               |                 | 48h       | 15.59   | 7        | 0.0168     | -0.591325  | -0.1030604 |            |
|                               | Glucose content | SITre2    | 24h     | 5.087    | 7          | 0.00871    | -0.9055588 | 0.9374615  |
|                               |                 |           | 48h     | 30.63    | 7          | 0.00521    | -0.5638709 | -0.1871251 |
| SITre1                        |                 | 24h       | 6.695   | 7        | 0.0609     | -0.5458466 | 0.01923859 |            |
|                               |                 | 48h       | 7.906   | 7        | 4.82E-02   | -2.325425  | -0.0146874 |            |
| SITre2                        |                 | 24h       | 7.578   | 7        | 0.0512     | -0.4099499 | 0.0017479  |            |
|                               |                 | 48h       | 287     | 7        | 7.12E-05   | -1.438494  | -1.033362  |            |
| Trehalose content             |                 | SITre1    | 24h     | 9.326    | 7          | 3.79E-02   | 0.06202438 | 1.30374    |
|                               |                 |           | 48h     | 0.156    | 7          | 0.713      | -0.8726575 | 0.6551388  |
|                               |                 | SITre2    | 24h     | 5.386    | 7          | 0.0811     | -0.160258  | 1.792689   |
|                               |                 |           | 48h     | 0.144    | 7          | 7.23E-01   | -0.294401  | 0.3876957  |
| Trehalase activity            | SITre1          | 24h       | 3454    | 7        | 5.02E-07   | -35.71618  | -32.49394  |            |
|                               |                 | 48h       | 321.2   | 7        | 5.70E-05   | -15.21831  | -11.13547  |            |
|                               | SITre2          | 24h       | 222.9   | 7        | 6.52E-04   | -15.6124   | -10.12573  |            |
|                               |                 | 48h       | 3589    | 7        | 4.65E-07   | -30.86082  | -28.12715  |            |
| Pupation rate                 | SITre1          | 0         | 28      | 1.00E+00 | -13.08834  | 13.08834   |            |            |
|                               | SITre2          | 4         | 28      | 1.16E-01 | -15.92152  | 2.58819    |            |            |
| cocoon weight                 | SITre1          | 20.75     | 28      | 3.03E-05 | -1.440179  | -0.559821  |            |            |
|                               | SITre2          | 24.39     | 28      | 7.45E-06 | -1.923979  | -0.8136405 |            |            |
| Emergence rate                | SITre1          | 2         | 28      | 2.30E-01 | -19.75501  | 6.421678   |            |            |
|                               | SITre2          | 8         | 28      | 4.74E-02 | -26.42168  | -0.2449888 |            |            |
| Proportion of abnormal adults | SITre1          | 2         | 28      | 2.30E-01 | -6.421678  | 19.75501   |            |            |
|                               | SITre2          | 2         | 28      | 2.30E-01 | -12.84336  | 39.51002   |            |            |
| Hind tibia length             | SITre1          | 116.1     | 28      | <2e-16   | -0.159473  | -0.1101348 |            |            |
|                               | SITre2          | 57.26     | 28      | 1.41E-12 | -0.127004  | -0.0744926 |            |            |
| Longevity                     | SITre1          | 2.728     | 28      | 1.05E-01 | -0.9128567 | 9.424793   |            |            |
|                               | SITre2          | 0.5       | 28      | 4.83E-01 | -4.340263  | 9.060263   |            |            |
